# Supplementary material for: Benzo[ a ]pyrene in urban environments of eastern Moscow: pollution levels and critical loads
Source: Copernicus journal article supplement (doi:10.5194/acp-17-2217-2017), 2017-02-14
Supplement: Supplementary file 1 [file critical loads.xlsx]

## Sheet: critical loads of BaP
BaP degradation intensity per year	Land-use zones	The critical loads of BaP (ng per m^2 per day) plotted against exposure time (years)
		5 years	10 years	25 years	50 years	100 years	250 years	500 years	1000 years
0.01	T	< 0	< 0	< 0	< 0	< 0	< 0	62.5067	77
	I	< 0	< 0	< 0	< 0	< 0	< 0	36.567	76
	L	< 0	< 0	< 0	< 0	< 0	55	75.0394	77
	M	< 0	< 0	< 0	< 0	< 0	< 0	69.8697	77
	H	< 0	< 0	< 0	< 0	44	72	76.3325	77
	A	1047	544	243	143	95	70	66.0946	66
	R	< 0	< 0	< 0	< 0	< 0	23	62.5421	66
0.02	T	< 0	< 0	< 0	< 0	< 0	125.015	153.235	153.425
	I	< 0	< 0	< 0	< 0	< 0	73.1396	152.887	153.425
	L	< 0	< 0	< 0	< 0	76.2256	150.079	153.402	153.425
	M	< 0	< 0	< 0	< 0	< 0	139.74	153.333	153.425
	H	< 0	< 0	< 0	88.2461	135.896	152.665	153.42	153.425
	A	1088.04	585.881	286.58	190.053	147.252	132.189	131.511	131.507
	R	< 0	< 0	< 0	< 0	< 0	125.085	131.464	131.507
0.03	T	< 0	< 0	< 0	< 0	< 0	227	230.135	230
	I	< 0	< 0	< 0	< 0	< 0	220	230.132	230
	L	< 0	< 0	< 0	18	191	230	230.137	230
	M	< 0	< 0	< 0	< 0	72	228	230.136	230
	H	< 0	< 0	80	182	221	230	230.137	230
	A	1130	629	332	241	205	197	197.26	197
	R	< 0	< 0	< 0	< 0	123	196	197.26	197
0.04	T	< 0	< 0	< 0	< 0	150.592	306.469	306.849	306.849
	I	< 0	< 0	< 0	< 0	< 0	305.775	306.849	306.849
	L	< 0	< 0	< 0	152.461	288.448	306.805	306.849	306.849
	M	< 0	< 0	< 0	< 0	231.582	306.666	306.849	306.849
	H	< 0	< 0	176.498	271.794	302.671	306.839	306.849	306.849
	A	1171.73	672.086	380.1	294.502	266.767	263.023	263.014	263.014
	R	< 0	< 0	< 0	< 0	227.69	262.928	263.014	263.014
0.05	T	< 0	< 0	< 0	< 0	313	384	383.562	384
	I	< 0	< 0	< 0	< 0	183	383	383.562	384
	L	< 0	< 0	< 0	273	375	384	383.562	384
	M	< 0	< 0	< 0	< 0	349	384	383.562	384
	H	< 0	< 0	271	359	382	384	383.562	384
	A	1214	716	430	351	330	329	328.767	329
	R	< 0	< 0	< 0	117	313	329	328.767	329
0.06	T	< 0	< 0	< 0	< 0	429.065	460.27	460.274	460.274
	I	< 0	< 0	< 0	< 0	372.078	460.263	460.274	460.274
	L	< 0	< 0	35.3233	382.76	456.599	460.274	460.274	460.274
	M	< 0	< 0	< 0	143.226	445.241	460.272	460.274	460.274
	H	< 0	51.6186	363.784	442.674	459.439	460.274	460.274	460.274
	A	1257.1	761.591	481.191	410.33	395.27	394.521	394.521	394.521
	R	< 0	< 0	< 0	245.727	387.466	394.52	394.521	394.521
0.07	T	< 0	< 0	< 0	81	524	537	536.986	537
	I	< 0	< 0	< 0	< 0	499	537	536.986	537
	L	< 0	< 0	174	483	535	537	536.986	537
	M	< 0	< 0	< 0	317	531	537	536.986	537
	H	< 0	150	455	525	537	537	536.986	537
	A	1300	808	534	471	461	460	460.274	460
	R	< 0	< 0	< 0	357	457	460	460.274	460
0.08	T	< 0	< 0	< 0	301.253	608.081	613.699	613.699	613.699
	I	< 0	< 0	< 0	< 0	597.824	613.699	613.699	613.699
	L	< 0	< 0	304.961	576.903	613.037	613.699	613.699	613.699
	M	< 0	< 0	< 0	463.198	610.993	613.699	613.699	613.699
	H	< 0	248.204	543.597	605.344	613.548	613.699	613.699	613.699
	A	1344.12	854.329	588.996	533.532	526.162	526.027	526.027	526.027
	R	< 0	< 0	< 0	455.396	524.758	526.027	526.027	526.027
0.09	T	< 0	< 0	< 0	478.793	688.087	690.411	690.411	690.411
	I	< 0	< 0	< 0	92.3763	683.844	690.411	690.411	690.411
	L	< 0	< 0	428.977	665.49	690.137	690.411	690.411	690.411
	M	< 0	< 0	< 0	588.478	689.292	690.411	690.411	690.411
	H	< 0	345.176	631.05	684.752	690.349	690.411	690.411	690.411
	A	1388.25	901.884	645.102	596.864	591.837	591.781	591.781	591.781
	R	< 0	< 0	89.939	543.942	591.256	591.781	591.781	591.781
0.1	T	< 0	< 0	< 0	625	766	767	767.123	767
	I	< 0	< 0	< 0	366	764	767	767.123	767
	L	< 0	< 0	547	750	767	767	767.123	767
	M	< 0	< 0	< 0	699	767	767	767.123	767
	H	< 0	441	717	763	767	767	767.123	767
	A	1433	950	702	661	658	658	657.534	658
	R	< 0	< 0	234	625	657	658	657.534	658
