# Supplementary material for: Benzo[ a ]pyrene in urban environments of eastern Moscow: pollution levels and critical loads
Source: Copernicus journal article supplement (doi:10.5194/acp-17-2217-2017), 2017-02-14
Supplement: Supplementary file 2 [file data.xlsx]

## Sheet: Лист1
Site	Land-use zone	BaP content in soils, ng/g	BaP content in the solid fraction of snow, ng/g	BaP fallout intensity with the solid fraction of snow onto the soil surface, ng per m^2 per day
1	R	183	14.2045	0.297619
2	R	798	245.614	4.16667
3	R	3	108.696	2.97619
4	M	191.6	621.683	48.8095
5	M	9.8	13.1579	0.297619
6	T	12.5	234.375	8.92857
7	T	404	383.523	48.2143
8	H	14.1	317.848	7.7381
9	R	0.3	151.515	1.78571
10	M	181	14.2045	0.297619
12	T	893	15469.1	1150
13	M	9.5	88.67	5.35714
14	T	1.4	214.505	12.5
15	M	202.2	220.751	5.95238
16	M	27	103.093	5.35714
17	R	0	26.738	0.297619
18	T	36.1	147.679	4.16667
19	T	581	137.429	10.119
20	T	84	263.337	69.0476
21	T	3278	211.706	10.119
22	T	307	34.7826	2.38095
23	T	706	236.14	13.6905
24	H	63	466.321	21.4286
25	H	28.8	131.926	2.97619
26	H	67	14.4928	0.297619
27	L	1.3	231.75	11.9048
28	L	298.8	1465.52	21.3952
30	L	83	395.683	6.54762
31	L	16.7	258.621	0.357143
32	A	0.2	202.899	4.16667
33	A	0	238.095	2.38095
34	H	0	187.5	3.57143
35	L	21.89	666.667	53.3333
36	R	0.9	379.147	4.7619
37	A	14	148.883	3.57143
38	M	7	502.793	5.35714
39	I	299.1	5127.61	394.643
40	T	82.2	6967.98	340.476
41	I	3611	22040	494.643
42	T	303.5	22530	444.405
43	I	1900	298.805	8.92857
44	I	1410.5	916.53	33.3333
45	M	1273	443.425	17.2619
46	M	70	417.69	10.119
47	I	595	274.76	13.0952
48	M	30	7278.29	283.333
49	M	617	1221.95	29.1667
50	M	614	4595.1	145.238
51	M	445	408.163	5.95238
52	T	663	26.738	1.78571
