# Supplementary material for: Benzo[ a ]pyrene in urban environments of eastern Moscow: pollution levels and critical loads
Source: Copernicus journal article supplement (doi:10.5194/acp-17-2217-2017), 2017-02-14
Supplement: Supplementary file [file acp-17-2217-2017-supplement-title-page.pdf › acp-17-2217-2017-supplement-title-page.pdf]

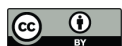

*Supplement of*

**Benzo[*a*]pyrene in urban environments of eastern Moscow: pollution levels and critical loads**

**Nikolay S. Kasimov et al.**

*Correspondence to:* Dmitry V. Vlasov (vlasov.msu@gmail.com)

- [acp-17-2217-2017-supplement-title-page.pdf](#)
- [critical loads.xlsx](#)
- [data.xlsx](#)

The copyright of individual parts of the supplement might differ from the CC-BY 3.0 licence.
